# Supplementary material
Source: publisher figshare collection journal article supplement (https://acs.figshare.com/ndownloader/files/5116192)
Supplement: Supplementary file 1 [file 5116192]

## *Supporting Information*

# **Oceanalin A, a Hybrid $\alpha,\omega$ - Bifunctionalized Sphingoid- Tetrahydroisoquinoline $\beta$ -Glycoside from the Marine Sponge *Oceanapia* sp.**

**Tatyana N. Makarieva,<sup>‡</sup> Vladimir A. Denisenko,<sup>‡</sup> Pavel S. Dmitrenok,<sup>‡</sup> Alla G. Guzil,<sup>‡</sup>  
Elena A. Santalova,<sup>‡</sup> Valentin A. Stonik,<sup>‡</sup> John B. MacMillan<sup>†</sup> and  
Tadeusz F. Molinski<sup>\*,†</sup>**

*Department of Chemistry, University of California, Davis, CA 95616 and Laboratory of MaNaPro  
Chemistry, Pacific Institute of Bioorganic Chemistry of the Russian Academy of Sciences, 690022  
Vladivostok, Russia*

<sup>†</sup> UC Davis      <sup>‡</sup> Pacific Institute of Bioorganic Chemistry

- S2 – S3 General procedure, isolation and oxidative degradation of **1**, characterization of  
**3-6**. Table S1: temperature dependent <sup>1</sup>H NMR (*d*<sub>5</sub>-pyridine) of peracetate **4**.  
S4 Table S2: <sup>1</sup>H NMR of **1a**, **3-6** (500 MHz).  
S5 <sup>1</sup>H NMR spectrum (600 MHz, CD<sub>3</sub>OD) of oceanalin A (**1**)  
S6 <sup>13</sup>C NMR spectrum (125 MHz, CD<sub>3</sub>OD) of oceanalin A (**1**)  
S7 DEPT (125 MHz, CD<sub>3</sub>OD) of oceanalin A (**1**)  
S8 <sup>1</sup>H-<sup>1</sup>H COSY Spectrum (500 MHz, CD<sub>3</sub>OD) of oceanalin A (**1**)  
S9 HSQC spectrum (600 MHz) of oceanalin A (**1**)  
S10 HMBC spectrum (600 MHz, *J* = 10 Hz) of oceanalin A (**1**)

*General* Rotations ( $[\alpha]_D$ ) were measured using a Perkin-Elmer 343 polarimeter. The circular dichroism (CD) spectrum were recorded on a Jasco J-500A spectropolarimeter in quartz cells of 1 cm path-length with the following parameters:  $\lambda$  range, 200-300 nm; band width 1 nm; scan speed 0.3 nm.sec<sup>-1</sup>. The NMR spectra were recorded on a Bruker DPX-400, DRX-500, and DRX-600 spectrometers at 400, 500, 600 for <sup>1</sup>H, and 100, 125 and 150 MHz, for <sup>13</sup>C, respectively, with (CH<sub>3</sub>)<sub>4</sub>Si as an internal standard. MALDI-TOF mass spectra were obtained on a Bruker Biflex III laser desorption mass-spectrometer coupled with delayed extraction using N<sub>2</sub> laser ( $\lambda$  337 nm) on 2,5-dihydroxybenzoic acid (DHB) and  $\alpha$ -cyano-4-hydroxycinnamic acid (CCA) as matrix. ESIMS mass spectra were obtained on a Surveyor MSQ Thermo Finnigan mass-spectrometer, coupled to an Agilent 1100 series HPLC, or by direct infusion in MeOH containing HCOOH (0.1%). FABMS and EIMS mass spectra were obtained on a AMD-604S mass-spectrometer (AMD-Intectra, Germany). FAB mass spectra were provided by the University of California, Riverside mass spectrometry facility.

Low pressure column liquid chromatography was performed using Si gel L (40/100  $\mu$ m, Chemapol, Praha, Czech Republic). Silica gel plates (4.5  $\times$  6.0 cm, 5-17  $\mu$ , Sorbfil, Russia) were used for thin layer chromatography. Preparative HPLC for isolation and separation of sphingolipids was carried out using a Rainin Binary HPLC system (Dynamax C<sub>18</sub> column 10  $\times$  250 mm, 5  $\mu$ m, 3 mL/min) in 80:20:0.1 MeOH-H<sub>2</sub>O-TFA with refractive index detection (Waters R401). Preparative HPLC separation of ozonolysis products was performed YMC Pack-ODS-A column (10  $\times$  250 mm, 5  $\mu$ m, 0.8 mL/min) in 80:20 ethanol-H<sub>2</sub>O using an Agilent Series 1100 Instrument equipped with differential refractometer RID-DE14901810.

### **Animal Material.**

A sponge specimen, *Oceanapia* sp. (order Haplosclerida, family Phloeodictyidae) was collected in November 1990 at a depth 48 meter by dredging near Scott reef, north western Australia (16° 33'6 S; 121° 07'1 E) during a scientific cruise aboard RV "Akademik Oparin".

A voucher specimen is kept under registration number PIBOC # O12-200 in the marine invertebrate collection of Pacific Institute of Bioorganic Chemistry (Vladivostok, Russia).

**Oceanalin A (1).** The sponge *Oceanapia* sp. was exhaustively extracted with MeOH and the *n*-BuOH-soluble fraction purified by Sephadex LH-20 (MeOH elution). The ninhydrin-positive fraction was separated repeatedly by reversed phase HPLC (Dynamax C<sub>18</sub> 10  $\times$  250 mm, 5  $\mu$ m, 3 mL/min) in 80:20:0.1 MeOH-H<sub>2</sub>O-TFA to give **1** as a colorless glass (0.003% of dry weight). Oceanalin A (**1**), 4.0 mg. Colorless

solid;  $[\alpha]_D -5.7^\circ$  (*c* 0.14 EtOH), UV (MeOH),  $\lambda_{\max}$  238 nm ( $\epsilon$  7600), 288 (7850).  $^1\text{H}$  and  $^{13}\text{C}$  NMR see Table 1. ESIMS  $m/z$   $[\text{M}+\text{Na}]^+$  737 (100 %),  $[\text{M}+\text{H}_2]^{2+}$  369 (30%). HRMS FAB  $m/z$  737.5286  $[\text{M}+\text{H}]^+$  Calcd,  $\text{C}_{41}\text{H}_{73}\text{N}_2\text{O}_9$  737.5311.  $^1\text{H}$ ,  $^{13}\text{C}$  NMR, see Table 1.

**Octaacetyl Oceanalin A (1a).** A sample of **1** (1.5 mg) was dissolved in pyridine (0.5 mL) and acetic anhydride (0.5 mL) and allowed to stand at  $25^\circ\text{C}$  for 18 h. Removal of the volatile material gave a residue (2.0 mg) of **1a**, MALDI MS  $m/z$   $[\text{M}+\text{Na}]^+$  1095,  $[\alpha]_D 0^\circ$  (*c* 0.15  $\text{CHCl}_3$ ).  $^1\text{H}$  NMR, see Table S2.

**Hydrolysis of Oceanalin A (1).** A solution of **1** (1.2 mg) in 6M HCl (1 mL) was heated at  $100^\circ\text{C}$  for 2.5 h. The mixture was cooled and treated with ion-exchange resin Dowex ( $\text{HCO}_3^-$  form). The aqueous solution was separated and concentrated to afford D-galactose (0.4 mg).

**Ozonolysis-Reduction of 1a.** Ozone was bubbled through a solution of **1a** (2.0 mg) in MeOH at a temperature of  $-20^\circ\text{C}$  to  $-30^\circ\text{C}$  over 4 h. The solution was cooled and treated with an excess of  $\text{NaBH}_4$  (5 mg). The mixture was left at room temperature overnight and quenched with acetic acid (to pH=7). The mixture was evaporated and treated with  $\text{Ac}_2\text{O}$ /pyridine (1:1, 0.5 mL) at room temperature, overnight. After removal of the volatiles, the residue was separated by chromatography (silica gel), using ethyl acetate as eluent, to afford a mixture of products **3-6** (1.0 mg). Separation of the mixture by preparative HPLC ( $\text{C}_{18}$ , 80:20 EtOH: $\text{H}_2\text{O}$ ) afforded the pure compounds **3-6**.

**Peracetate 3.** 0.7 mg, colorless solid,  $m/z$  710  $[\text{M}+\text{Na}^+]$ ,  $[\alpha]_D +1^\circ$  (*c* 0.07 EtOH),  $^1\text{H}$  NMR see Table S2.

**Peracetate 4.** 0.7 mg, colorless solid,  $m/z$  528  $[\text{M}+\text{Na}^+]$ ,  $[\alpha]_D 0^\circ$  (*c* 0.07 EtOH),  $^1\text{H}$  NMR see Table S2.

**Peracetate 5.** 0.2 mg, colorless solid,  $m/z$  754  $[\text{M}+\text{Na}^+]$ ,  $[\alpha]_D +1^\circ$  (*c* 0.02 EtOH),  $^1\text{H}$  NMR see Table S2.

**Peracetate 6.** 0.2 mg, colorless solid,  $m/z$  484  $[\text{M}+\text{Na}^+]$ ,  $[\alpha]_D 0^\circ$  (*c* 0.02 EtOH),  $^1\text{H}$  NMR see Table S2.

**Table S1.** Variable temperature  $^1\text{H}$  NMR Data for compound **4** (pyridine- $d_5$ , 500 MHz)<sup>[a]</sup>

| T / $^\circ\text{C}$ | $\delta$ OAc |       |       |       |       |       | $\delta$ OMe |       |
|----------------------|--------------|-------|-------|-------|-------|-------|--------------|-------|
|                      | C33a         | C33b  | C32   | C27a  | C27b  | C17   | C18a         | C18b  |
| 27                   | 2.320        | 2.305 | 2.315 | 2.204 | 2.193 | 2.053 | 3.403        | 3.394 |
| 40                   | 2.292        | 2.282 | 2.290 | 2.188 | 2.171 | 2.036 | 3.395        | 3.382 |
| 60                   | 2.263        | 2.263 | 2.256 | 2.166 | 2.146 | 2.016 | 3.374        | 3.374 |
| 80                   | 2.238        | 2.238 | 2.232 | 2.129 | 2.129 | 1.996 | 3.365        | 3.365 |
| 100                  | 2.222        | 2.222 | 2.217 | 2.113 | 2.113 | 1.981 | 3.357        | 3.357 |
| 110                  | 2.210        | 2.210 | 2.204 | 2.107 | 2.107 | 1.976 | 3.355        | 3.355 |

[a]. For clarity, the numbering of **3-6** conforms to that of **1**. Designations ‘a’ and ‘b’ are arbitrary assignments of doubled AcO and OMe signals.

**Table S2.** <sup>1</sup>H NMR data for octa-acetyloceanalin A (**1a**) and degradation products **3-6**.<sup>a</sup>

| #                | <b>1a</b>                                       | <b>3</b>             | <b>4</b>                                               | <b>5</b>                                     | <b>6</b>                                         |
|------------------|-------------------------------------------------|----------------------|--------------------------------------------------------|----------------------------------------------|--------------------------------------------------|
| 1                | 1.167 (d, 6.8)                                  | 1.165 (d, 6.8)       | -                                                      | 1.165 (d, 6.8)                               | -                                                |
| 2                | 4.09 (m)                                        | 4.09 (m)             | -                                                      | 4.09 (m)                                     | -                                                |
| 3                | 3.49 (dt, 3.0, 6.5)                             | 3.49 (dt, 2.7, 6.3)  | -                                                      | 3.49 (td, 6.2, 2.7)                          | -                                                |
| 6-13             | 1.25 (bs)                                       | 1.25 (bs)            | -                                                      | 1.25 (bs)                                    | -                                                |
| 16               | 5.58 (m)                                        | 4.05 (t, 6.7)        | -                                                      | 3.35 (m)                                     | -                                                |
| 17               | 5.22 (dd, 8.3, 15.5)                            | -                    | 4.16 (dt, 11.6, 3.7);<br>4.01 (ddd, 2.4, 6.0,<br>11.6) | 4.02 (dd, 6.0, 11.6)<br>4.17 (dd, 3.3, 11.6) | -                                                |
| 18               | 3.43 (m)                                        | -                    | 3.40 (m)                                               | -                                            | 4.05 (m, 2H)                                     |
| 20-24            | 1.25 (s)                                        | -                    | 1.25 (bs)                                              | -                                            | 1.25 (bs)                                        |
| 26               | 5.58 (m)                                        | -                    | 5.58 (dd, 5.5, 9.7)                                    | -                                            | 5.58 (dd, 5.7,<br>9.5)                           |
|                  | 4.68 (m)                                        | -                    | 4.69 (m)                                               | -                                            | 4.69 (m)                                         |
| 2-NHAc           | 5.84 (d, 8.3)                                   | 5.81 (d, 8.4)        | -                                                      | 5.84 (d, 8.3)                                | -                                                |
| 28a              | 3.78 (ddd, 4.0, 5.4, 13.6)                      | -                    | 3.78 (dt, 13.5, 5.1)                                   | -                                            | 3.78 (m)                                         |
| 28b              | 3.52 (m)                                        | -                    | 3.52 (m)                                               | -                                            | 3.50 (m)                                         |
| 29a              | 2.65-3.05 (m)                                   | -                    | 2.65-3.05 (m)                                          | -                                            | -                                                |
| 29b              | 2.65-3.05 (m)                                   | -                    | 2.65-3.05 (m)                                          | -                                            | -                                                |
| 31               | 6.93 (s)                                        | -                    | 6.93 (s)                                               | -                                            | 6.93 (s)                                         |
| 34               | 6.94 (s)                                        | -                    | 6.95 (s)                                               | -                                            | 6.95 (s)                                         |
| OCH <sub>3</sub> | 3.230 (s) <sup>b</sup> ; 3.233 (s) <sup>b</sup> | -                    | 3.399 (s), <sup>b</sup> 3.404 (s) <sup>b</sup>         | 3.40 (s)                                     | -                                                |
| 1'               | 4.48 (d, 8.0)                                   | 4.48 (d, 7.9)        | -                                                      | 4.48 (d, 7.9)                                | -                                                |
| 2'               | 5.16 (dd, 8.0, 10.6)                            | 5.16 (dd, 7.9, 10.6) | -                                                      | 5.16 (dd, 7.9, 10.6)                         | -                                                |
| 3'               | 5.04 (dd, 3.3, 10.6)                            | 5.04 (dd, 3.5, 10.6) | -                                                      | 5.04 (dd, 3.3, 10.6)                         | -                                                |
| 4'               | 5.39 (dd, 0.8, 3.3)                             | 5.39 (dd, 0.8, 3.5)  | -                                                      | 5.39 (dd, 0.8, 3.3)                          | -                                                |
| 5'               | 3.91 (dt, 0.8, 6.6)                             | 3.91 (td, 6.7, 0.9)  | -                                                      | 3.90 (td, 6.6, 0.8)                          | -                                                |
| 6'               | 4.10 (dd, 6.6, 11.3)                            | 4.10 (dd, 6.7, 11.4) | -                                                      | 4.10 (dd, 6.6, 11.1)                         | -                                                |
|                  | 4.19 (dd, 6.6, 11.3)                            | 4.19 (dd, 6.7, 11.4) | -                                                      | 4.19 (dd, 6.6, 11.1)                         | -                                                |
| 16-OAc           |                                                 | 2.04 (s)             | -                                                      | -                                            | -                                                |
| 17-OAc           |                                                 | -                    | -                                                      | 2.08 (s)                                     | -                                                |
| 18-OAc           |                                                 | -                    | -                                                      | -                                            | 2.04 (s)                                         |
| 4xOAc            | 1.97 (s)                                        | 1.97 (s);            | -                                                      | 1.97 (s)                                     | -                                                |
|                  | 2.00 (s)                                        | 1.99 (s);            | -                                                      | 1.99 (s)                                     | -                                                |
|                  | 2.04 (s)                                        | 2.04 (s);            | -                                                      | 2.04 (s)                                     | -                                                |
|                  | 2.05 (s)                                        | 2.05 (s)             | -                                                      | 2.05 (s)                                     | -                                                |
| 32-OAc           | 2.28 (s)                                        | -                    | 2.28 (s)                                               | -                                            | 2.28 (s)                                         |
| 33-OAc           | 2.27 (s) <sup>b</sup> ; 2.29 (s) <sup>b</sup>   | -                    | 2.27 (s) <sup>b</sup> ; 2.29 (s) <sup>b</sup>          | -                                            | 2.27 (s) <sup>b</sup> ,<br>2.29 (s) <sup>b</sup> |
| 27-NHAc          | 2.15 (s) <sup>b</sup> ; 2.16 (s) <sup>b</sup>   | -                    | 2.15 (s) <sup>b</sup> ; 2.16 (s) <sup>b</sup>          | -                                            | 2.15 (s) <sup>b</sup> ,<br>2.16 (s) <sup>b</sup> |

<sup>a</sup>, CDCl<sub>3</sub>, 500 MHz, δ<sub>H</sub> (mult, *J* Hz). For clarity, the numbering of **3-6** conforms to that of **1**; *b*, doubled signals.

TM\_242

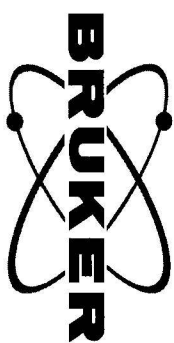

Current Data Parameters  
 NAME TM\_242  
 EXPNO 1  
 PROCNO 1

F2 - Acquisition Parameters  
 Date\_ 20040420  
 Time 10.08  
 INSTRUM spect  
 PROBHD 5 mm TXI  
 PULPROG zg  
 TD 32768  
 SOLVENT MeOD  
 NS 16  
 DS 0  
 SWH 9615.385 Hz  
 FIDRES 0.293438 Hz  
 AQ 1.7040380 sec  
 RG 10  
 DW 52.000 usec  
 DE 6.00 usec  
 TE 300.0 K  
 D1 1.00000000 sec

===== CHANNEL f1 =====  
 NUC1 1H  
 P1 6.00 usec  
 PL1 -6.00 dB  
 SFO1 600.3028214 MHz  
 F2 - Processing parameters  
 SI 32768  
 SF 600.3000118 MHz  
 WDW EM  
 SSB 0  
 LB 0.30 Hz  
 GB 0  
 PC 1.00

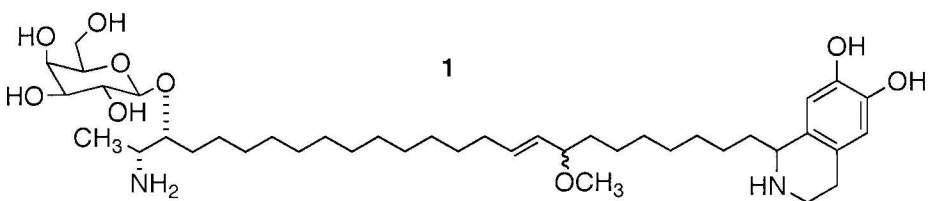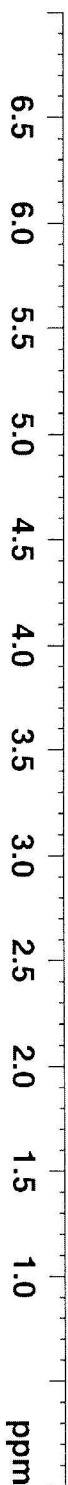

<sup>13</sup>C NMR (CD<sub>3</sub>OD, 125 MHz),  
Oceanalin A (1)

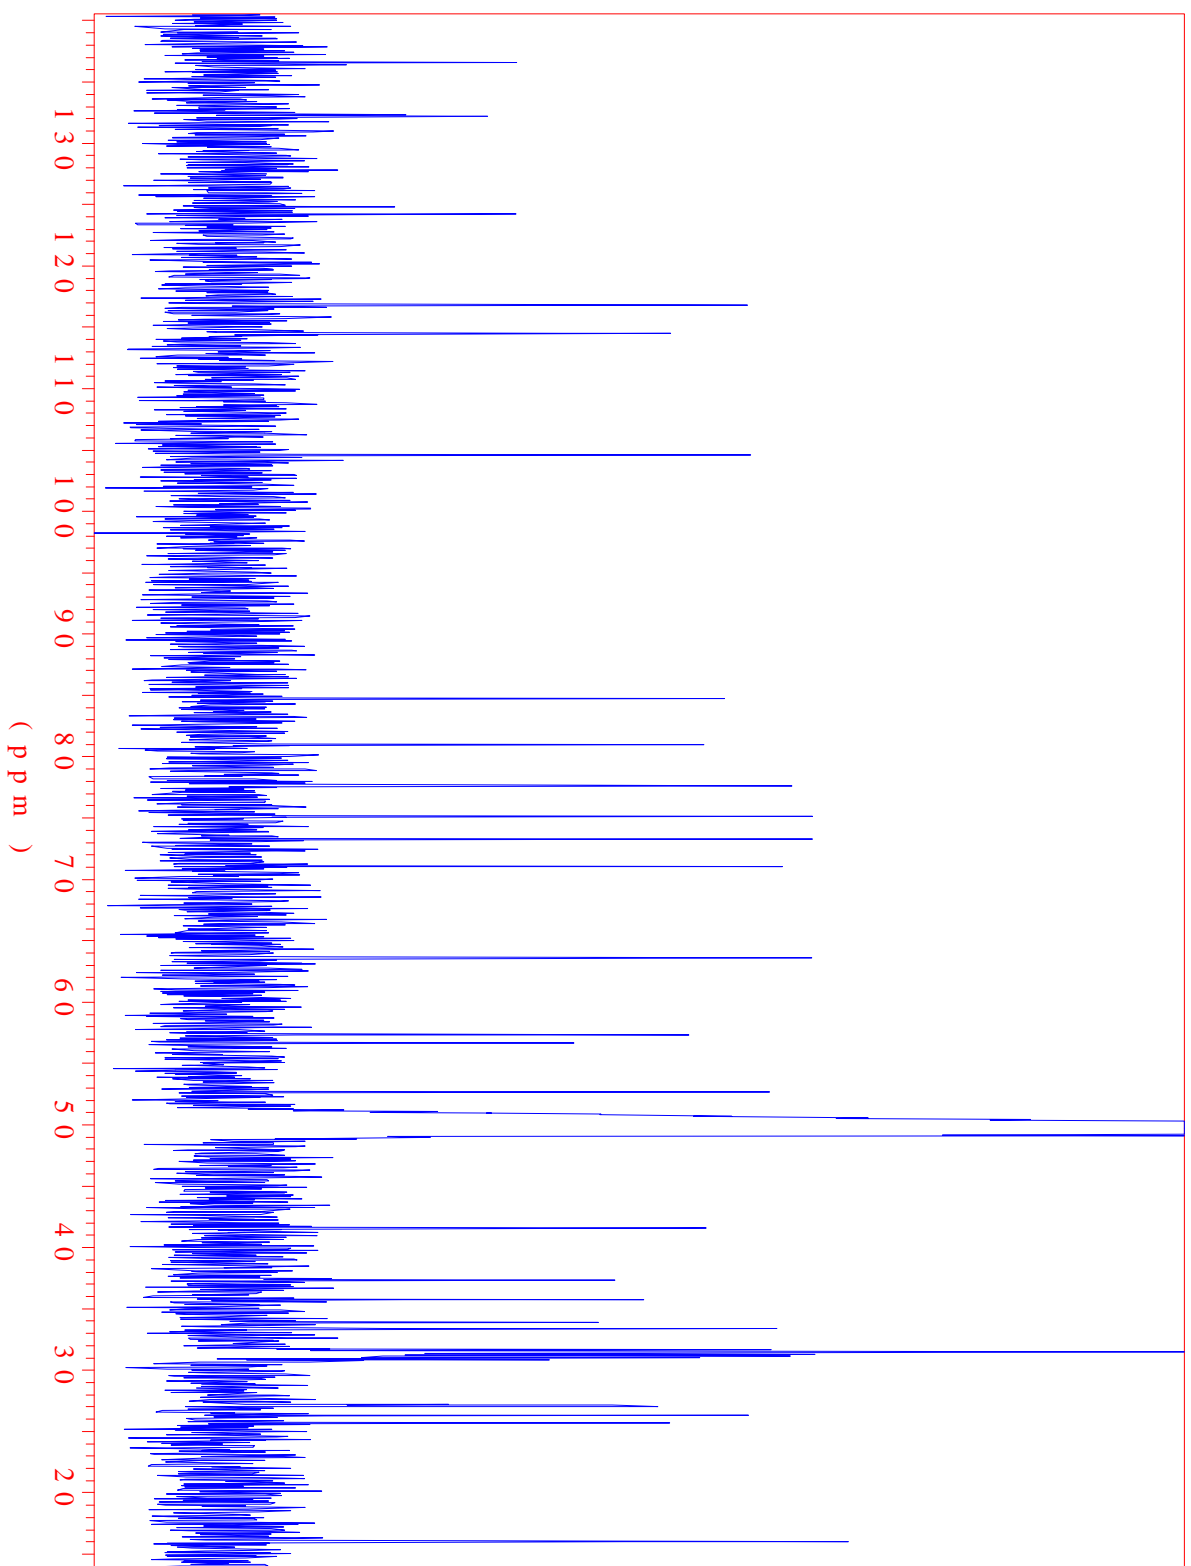

<sup>13</sup>C NMR (CD<sub>3</sub>OD, 125 MHz), DEPT 135,  
Oceanalin A (1)

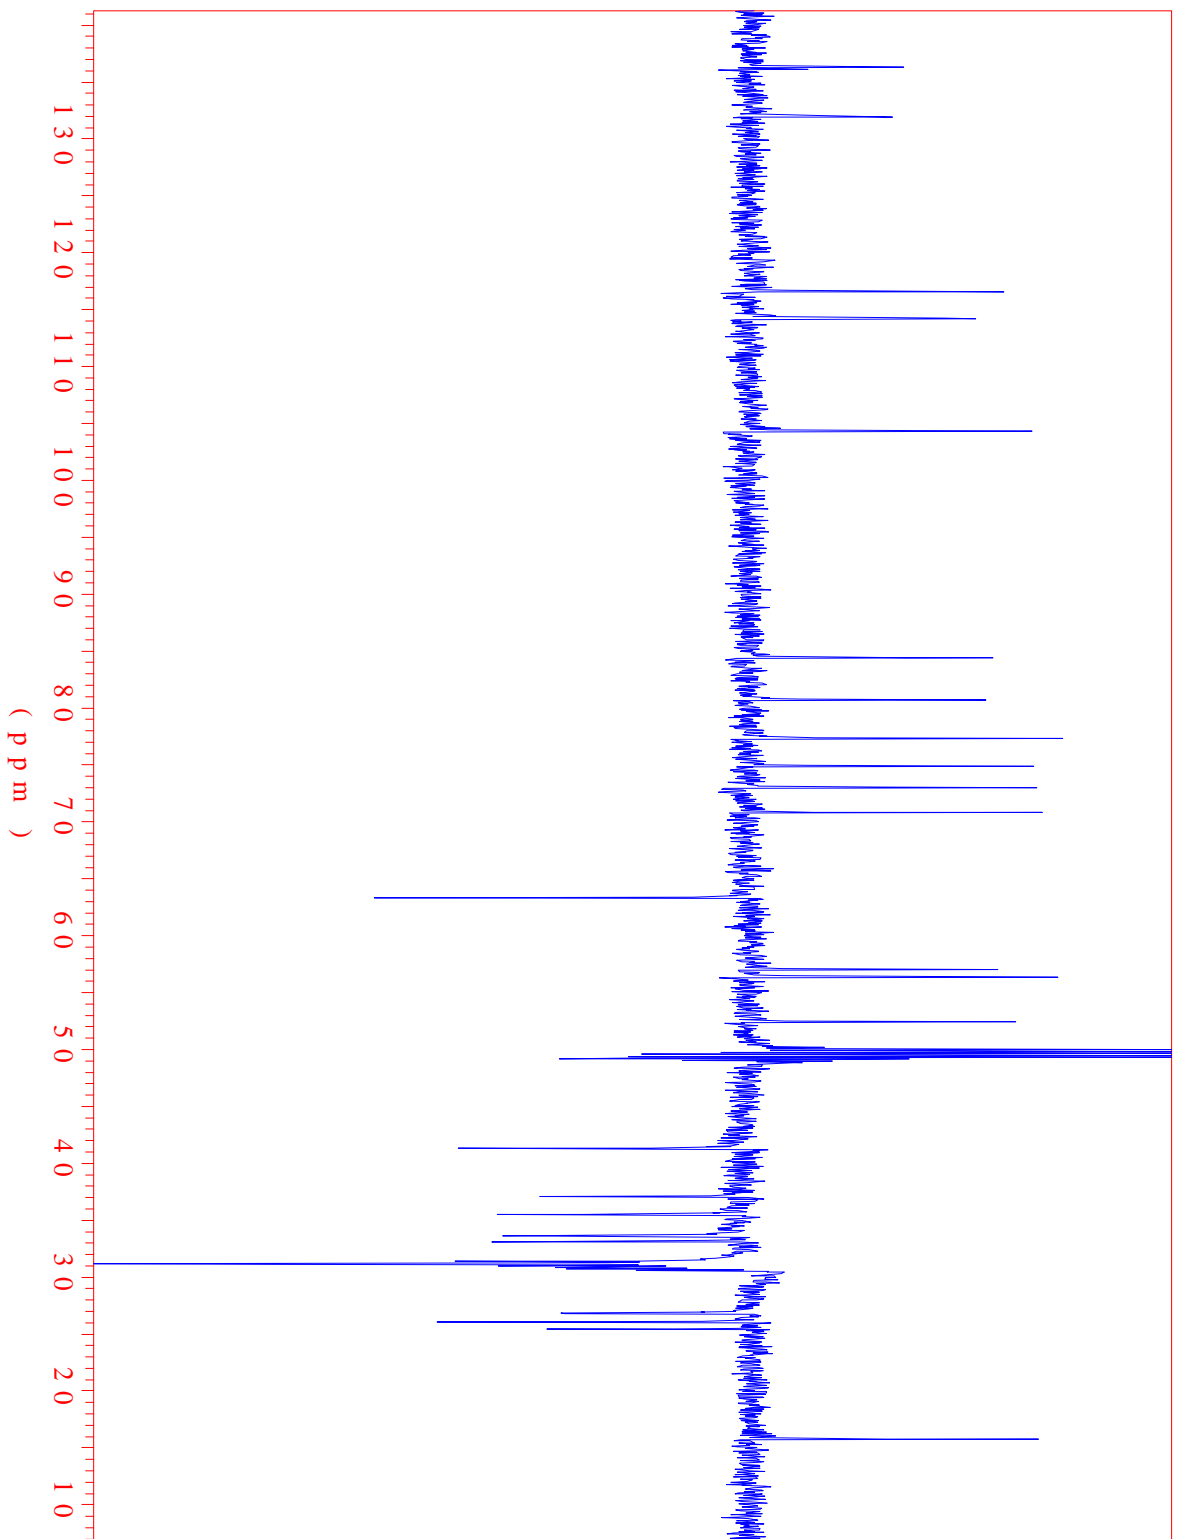

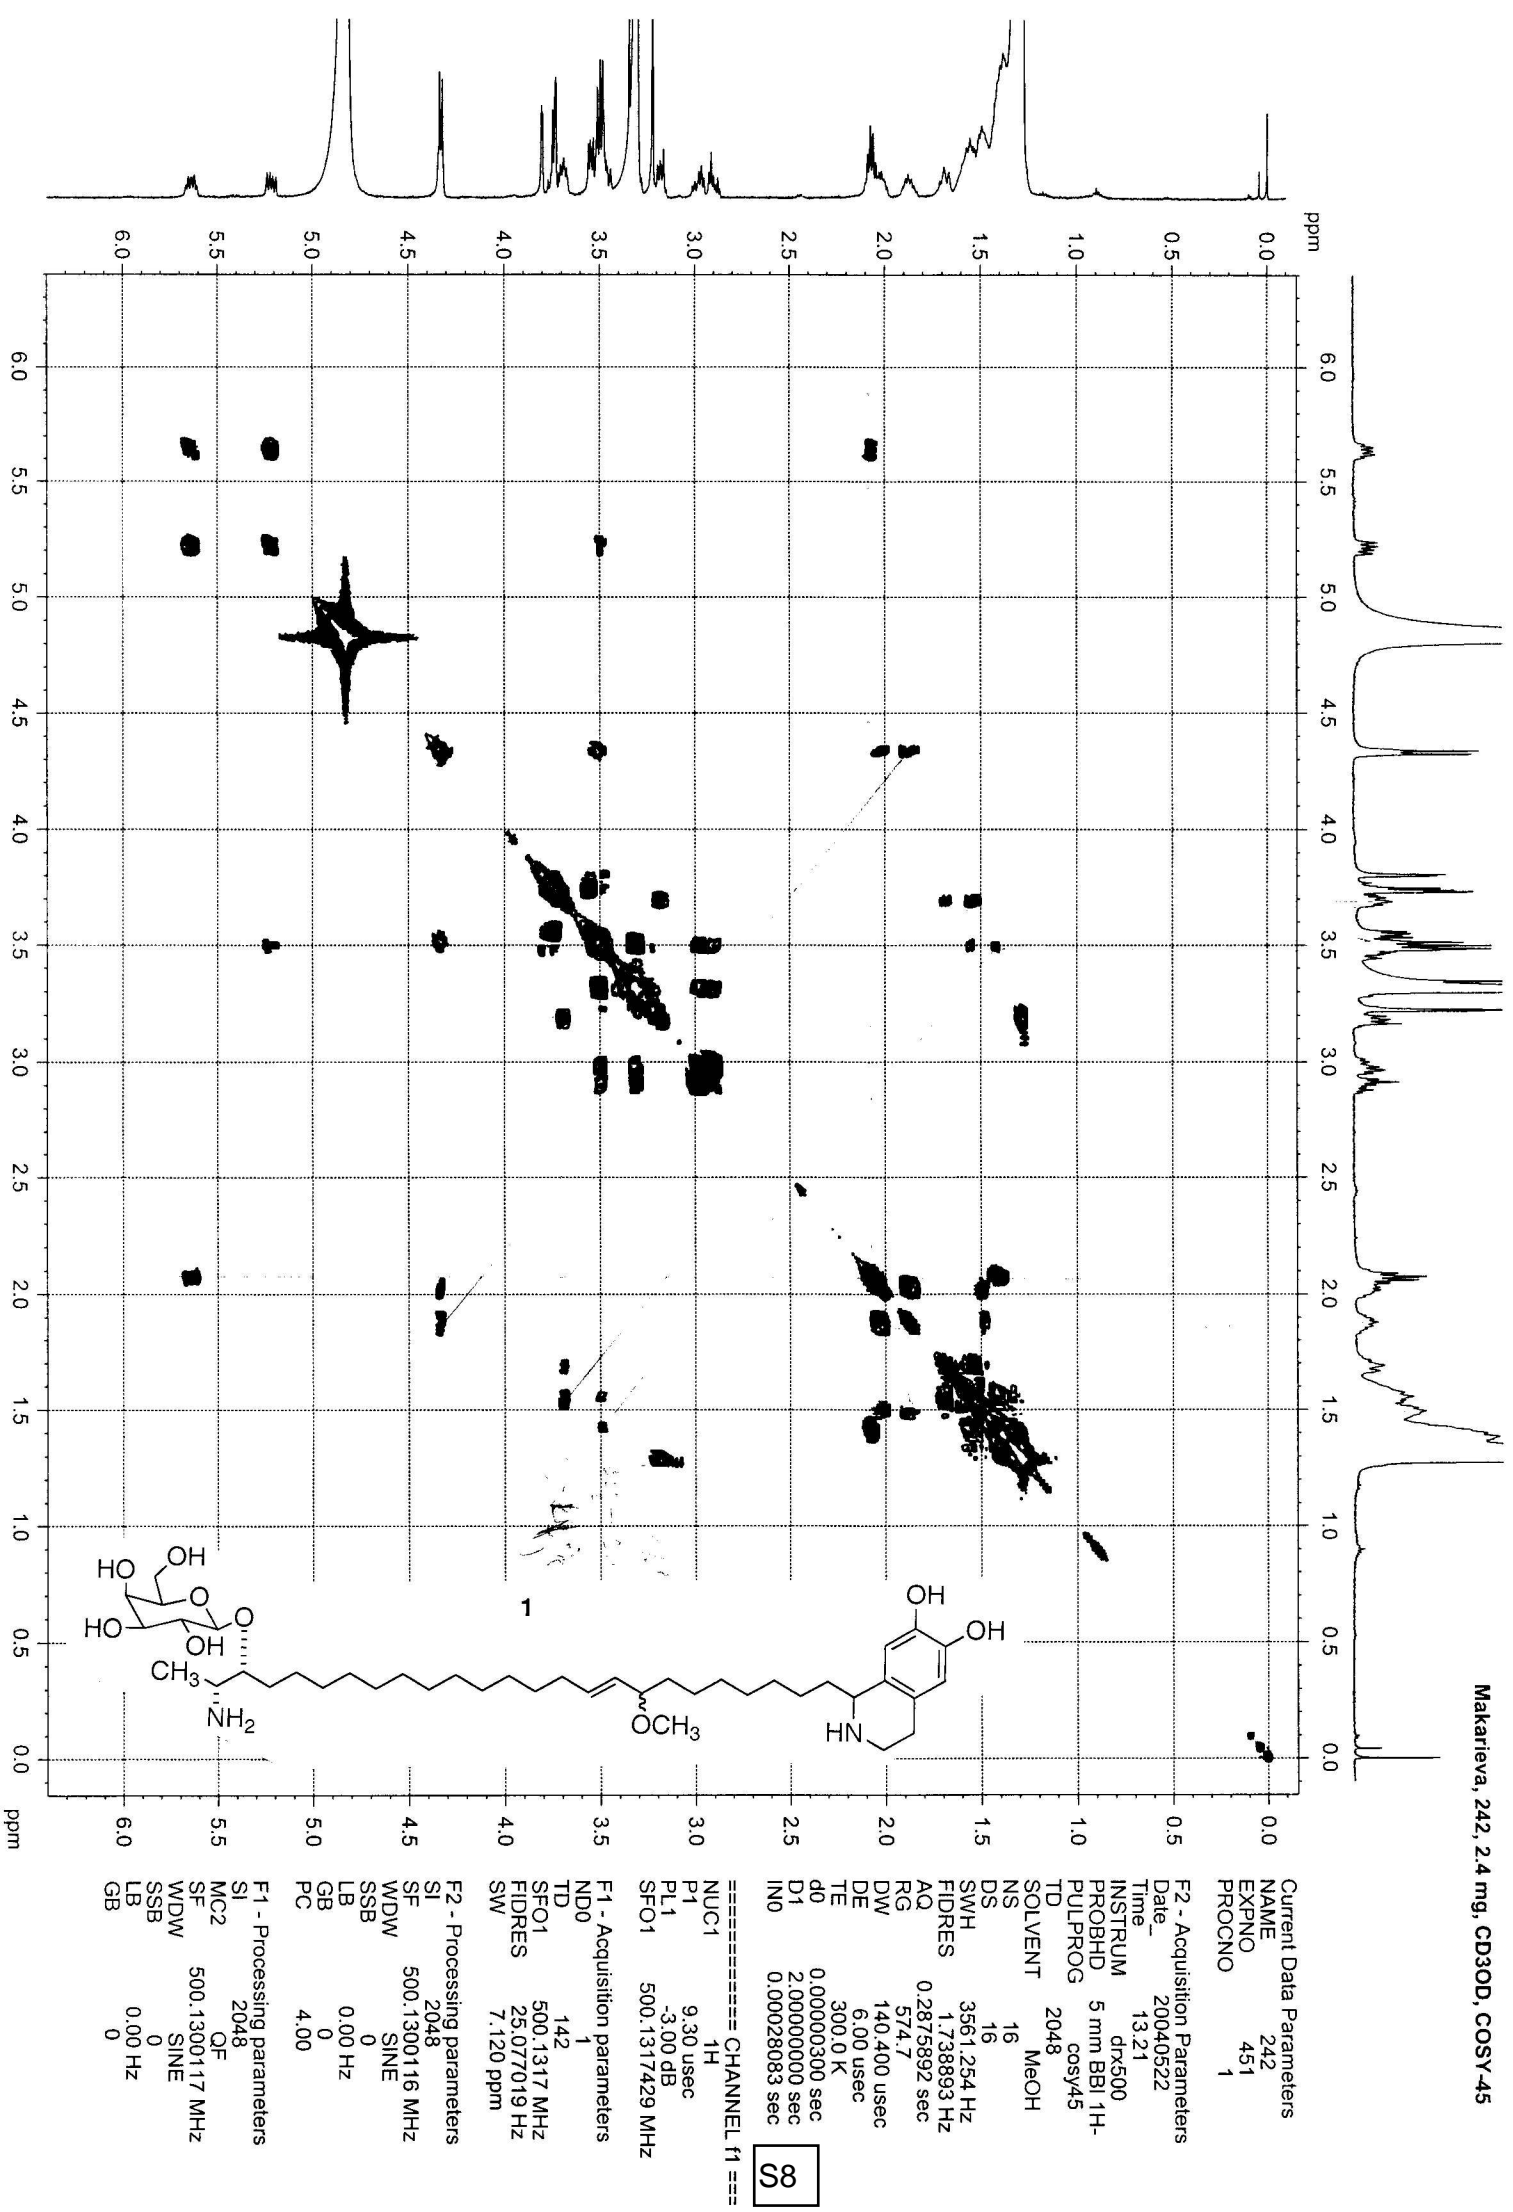

Current Data Parameters  
NAME 242  
EXPNO 451  
PROCNO 1

F2 - Acquisition Parameters  
Date\_ 20040522  
Time 13.21  
INSTRUM drx500  
PROBHD 5 mm BBI 1H-  
PULPROG cosy45  
TD 2048  
SOLVENT MeOH  
NS 16  
DS 16  
SWH 3561.254 Hz  
FIDRES 1.738893 Hz  
AQ 0.2875892 sec  
RG 574.7  
DW 140.400 usec  
DE 6.00 usec  
TE 300.0 K  
d0 0.00000300 sec  
D1 2.00000000 sec  
IN0 0.00028083 sec

S8

===== CHANNEL f1 =====  
NUC1 1H  
P1 9.30 usec  
PL1 -3.00 dB  
SFO1 500.1317429 MHz

F1 - Acquisition parameters  
ND0 1  
TD 142  
SFO1 500.1317 MHz  
FIDRES 25.077019 Hz  
SW 7.120 ppm

F2 - Processing parameters  
SI 2048  
SF 500.1300116 MHz  
WDW SINE  
SSB 0  
LB 0.00 Hz  
GB 0  
PC 4.00

F1 - Processing parameters  
SI 2048  
MC2 OF  
SF 500.1300117 MHz  
WDW SINE  
SSB 0  
LB 0.00 Hz  
GB 0



No title

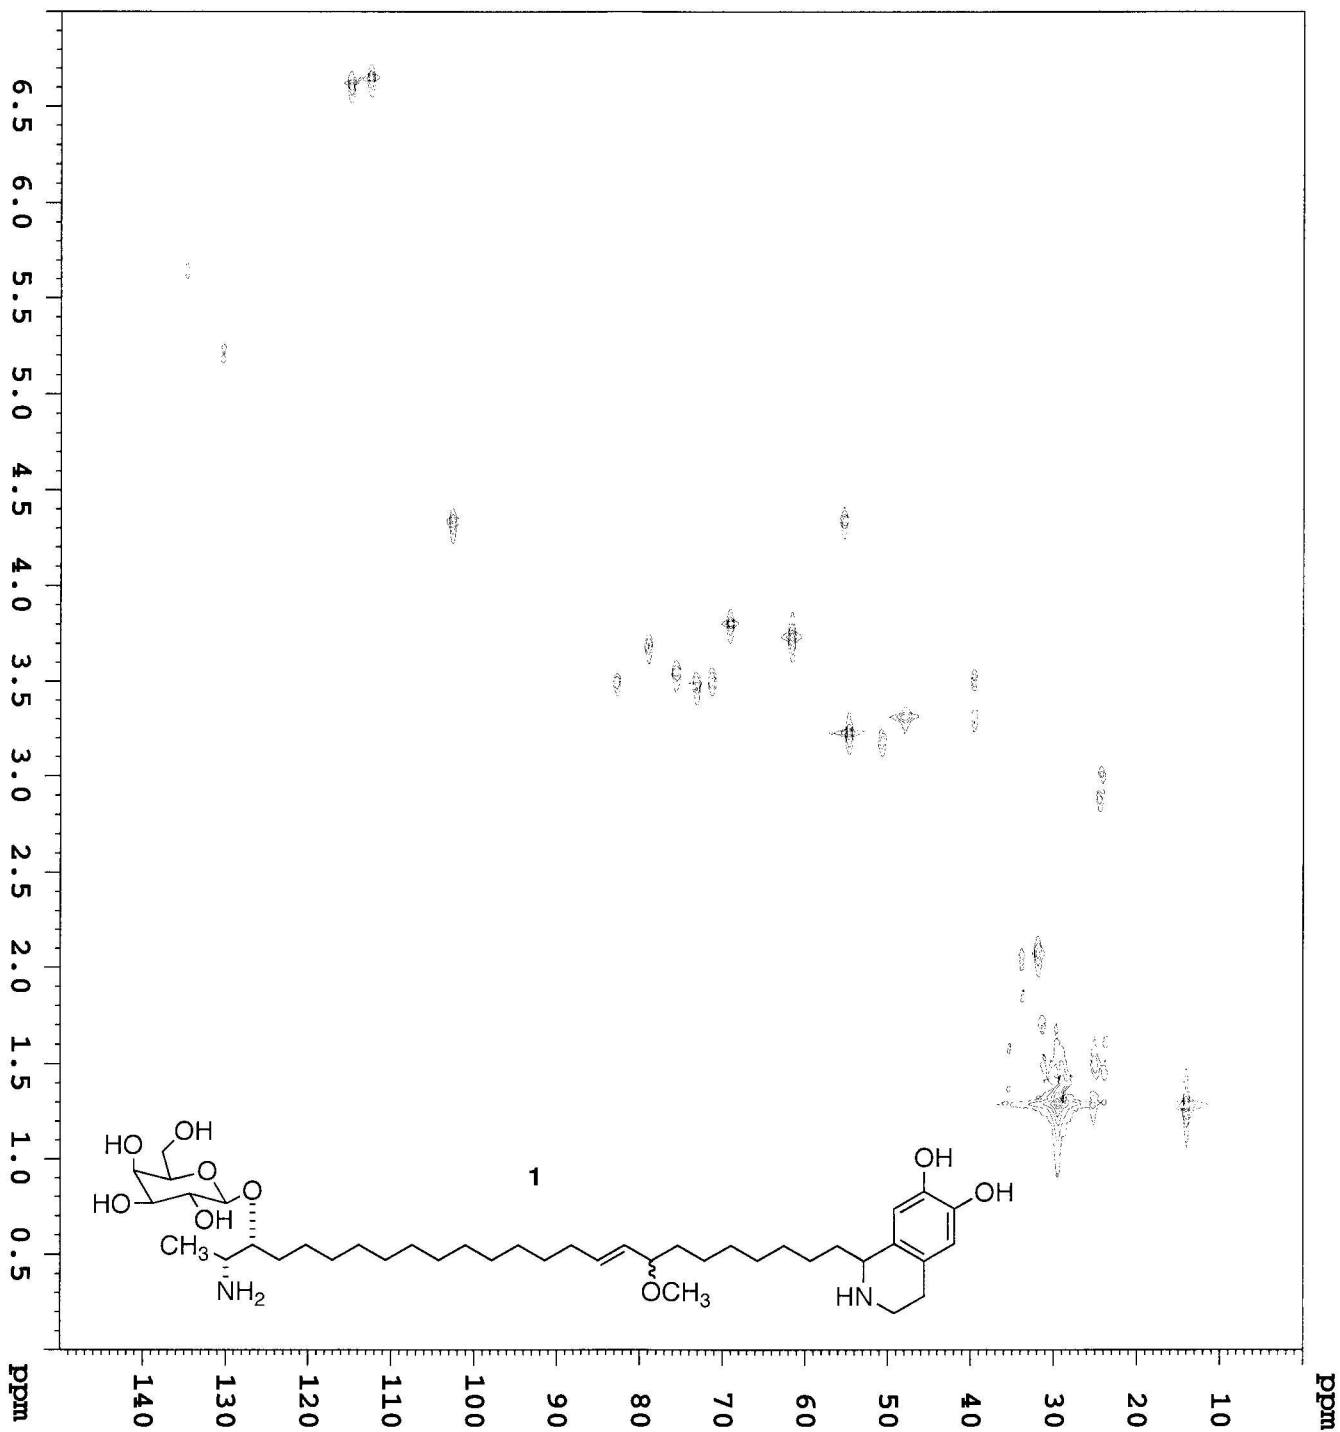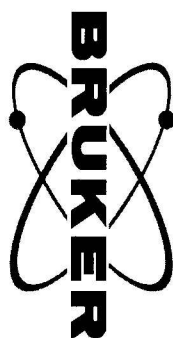

Current Data Parameters  
NAME: TW\_242  
EXPNO: 301  
PROCNO: 1

P2 - Acquisition Parameters  
Date\_: 20040420  
Time: 11:36  
INSTRUM: spect  
PROBHD: 5 mm TXI 2-GP  
PULPROG: invfpg2  
TD: 2048  
SOLVENT: DMSO  
NS: 16  
DS: 4  
SWH: 6009.615 Hz  
FIDRES: 2.934382 Hz  
AQ: 0.1705268 sec  
RG: 1000  
DB: 8.000000  
DE: 6.00 usec  
TE: 300.40 K  
CNS2: 140.0000000  
d0: 0.0000000 sec  
d1: 1.0000000 sec  
d2: 1.0000000 sec  
d12: 0.0000000 sec  
d13: 0.0000000 sec  
d16: 0.0000000 sec  
d10: 0.0034743 sec  
d11: 0.0000000 sec  
MCHEST: 0.0000000 sec  
MCWRR: 1.0000000 sec

===== CHANNEL f1 =====  
NUC1: 13C  
P1: 11.00 usec  
P2: 22.00 usec  
PL1: -6.00 dB  
SFO1: 600.300015 MHz

===== CHANNEL f2 =====  
CPDPRG2: gtp  
NUC2: 13C  
P3: 18.10 usec  
PCPD2: 60.00 usec  
PL2: -6.20 dB  
PUL2: 6.00 usec  
SFO2: 150.9546117 MHz

===== GRADIENT CHANNEL =====  
GNAME1: SINE.100  
GSDM1: 0.00 %  
GSDM2: 0.00 %  
GSDM3: 0.00 %  
GPX1: 0.00 %  
GPX2: 0.00 %  
GPX3: 0.00 %  
GPY1: 0.00 %  
GPY2: 0.00 %  
GPY3: 0.00 %  
GPZ1: 50.00 %  
GPZ2: 30.00 %  
GPZ3: 40.10 %  
F16: 1000.00 usec

F1 - Acquisition Parameters  
ND0: 2  
TD: 256  
SFO1: 150.9546117 MHz  
FIDRES: 94.313867 Hz  
SW: 160.012 ppm  
FQCODE: QF

P2 - Processing Parameters  
SI: 32768  
SF: 600.3000000 MHz  
WDW: EM  
SSB: 3  
LB: 0.00 Hz  
GB: 0  
PC: 1.40

F1 - Processing Parameters  
SI: 1024  
SF: 150.9455510 MHz  
WDW: EM  
SSB: 3  
LB: 0.00 Hz  
GB: 0

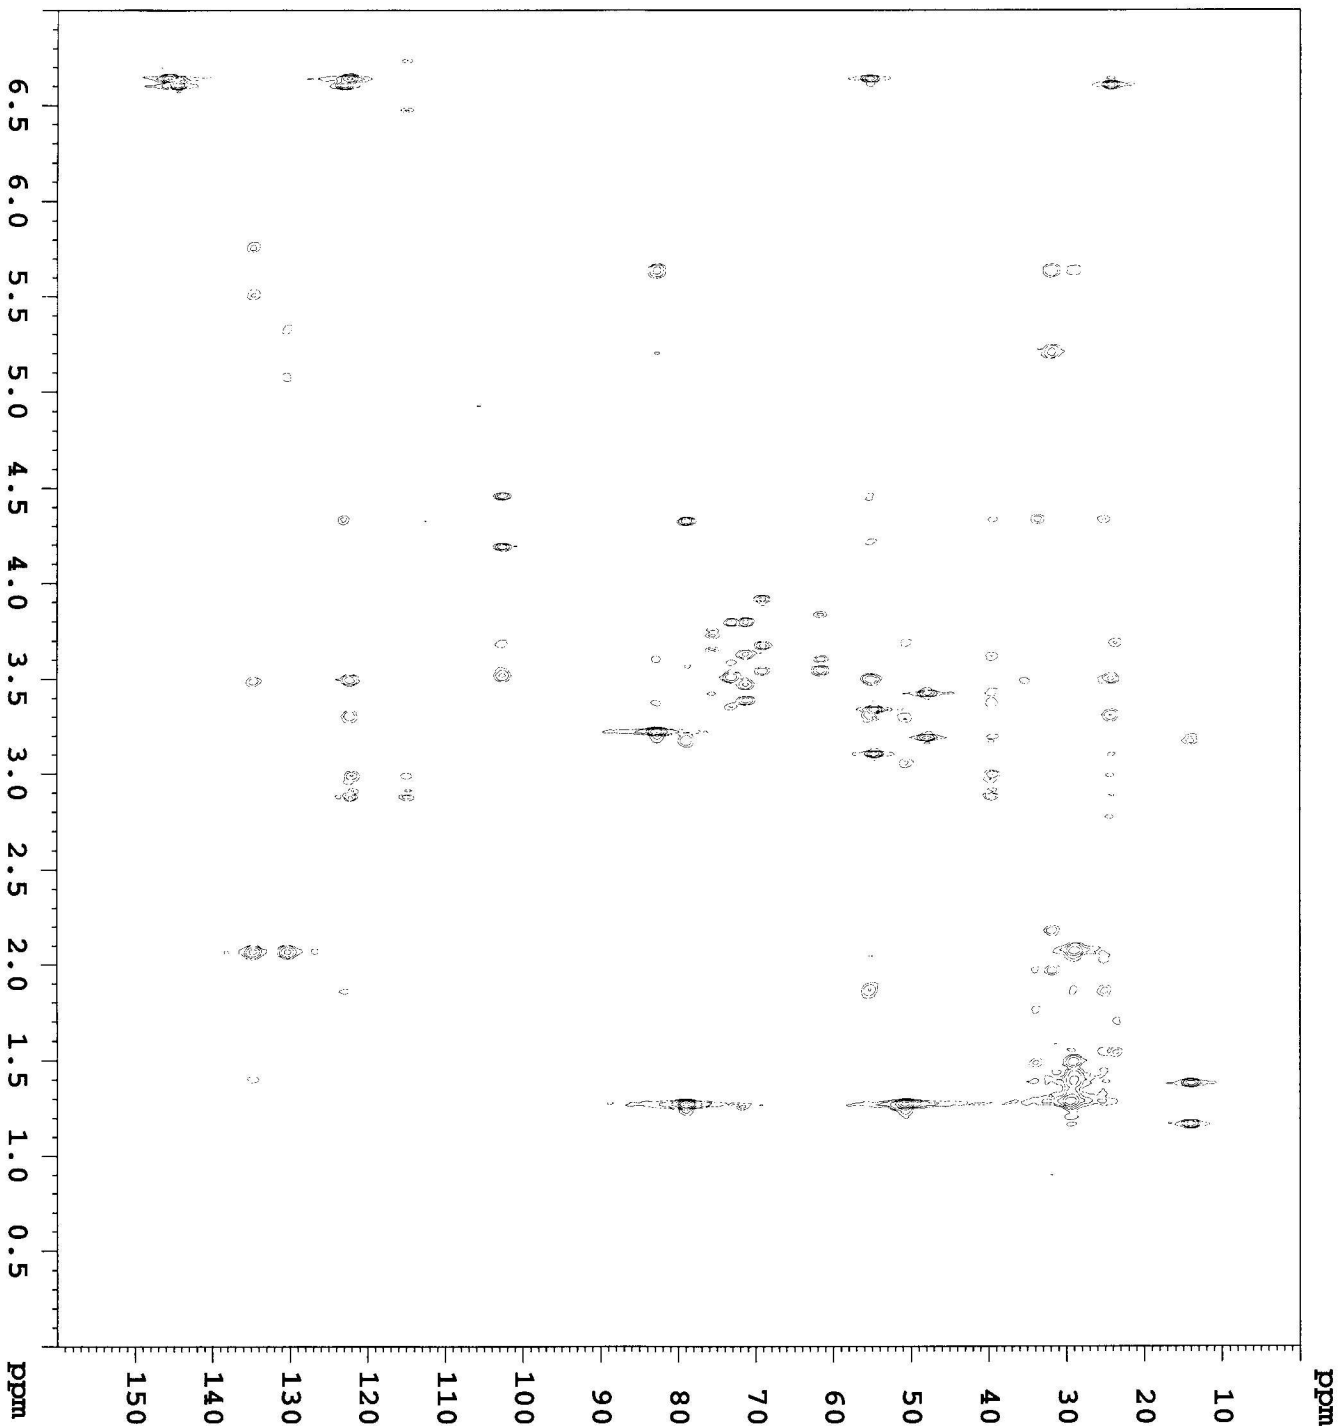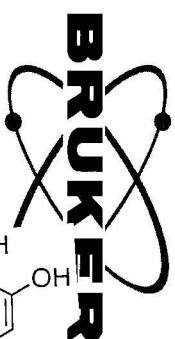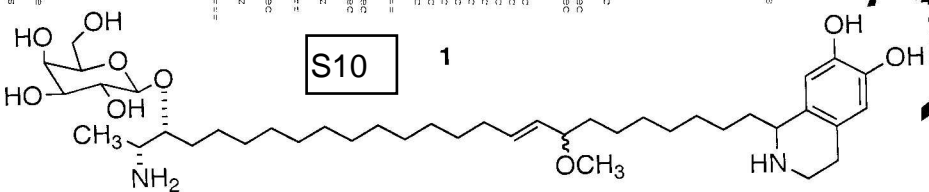

S10

Current Data Parameters  
NAME TM\_242  
EXPNO 300  
PROCNO 1

F2 - Acquisition Parameters  
Date\_ 20040404  
Time 20:10:10  
INSTRUM spect  
PROBHD 5 mm TXI 2-GP  
PULPROG invgprplndrf  
TD 2048  
SOLVENT CDCl3  
NS 16  
DS 16  
SWH 6009.615 Hz  
FIDRES 2.934382 Hz  
AQ 0.1705268 sec  
RG 5000  
WDW EM  
SSB 0  
GB 0  
PC 1.40  
TE 300.0 K  
CSTP2 140.0000000  
d0 0.00000300 sec  
d1 1.000000000 sec  
d2 0.00257143 sec  
d3 0.000000000 sec  
d4 0.00000400 sec  
d5 0.000000000 sec  
d6 0.00030000 sec  
d7 0.00001506 sec  
d8 0.000000000 sec  
d9 0.000000000 sec  
MCREST 1.000000000 sec  
MCMRK

===== CHANNEL f1 =====  
NUC1 1H  
P1 11.00 usec  
PL1 22.00 usec  
PL2 -6.00 dB  
SFO1 600.300015 MHz

===== CHANNEL f2 =====  
NUC2 13C  
P2 18.10 usec  
PL2 -6.00 dB  
SFO2 150.9621590 MHz

===== GRADIENT CHANNEL =====  
GPNAM1 SINE:100  
GPNAM2 SINE:100  
GPNAM3 SINE:100  
SFO1 600.300015 MHz  
SFO2 150.9621590 MHz  
GPR1 0.00 %  
GPR2 0.00 %  
GPR3 0.00 %  
GPR4 0.00 %  
GPR5 0.00 %  
GPR6 0.00 %  
GPR7 0.00 %  
GPR8 0.00 %  
GPR9 0.00 %  
GPR10 0.00 %  
GPR11 0.00 %  
GPR12 0.00 %  
GPR13 0.00 %  
GPR14 0.00 %  
GPR15 0.00 %  
GPR16 0.00 %  
GPR17 0.00 %  
GPR18 0.00 %  
GPR19 0.00 %  
GPR20 0.00 %  
GPR21 50.00 %  
GPR22 30.00 %  
GPR23 40.10 %  
GPR24 1000.00 usec

F1 - Acquisition Parameters  
ND0 256  
TD 256  
SFO1 150.9622 MHz  
FIDRES 129.66045 Hz  
AQ 0.1705268 sec  
RG 5000  
WDW EM  
SSB 0  
GB 0  
PC 1.40

F2 - Processing Parameters  
SI 1024  
SF 600.3000079 MHz  
WDW EM  
SSB 0  
GB 0  
PC 1.40

F1 - Processing Parameters  
SI 1024  
SF 600.3000079 MHz  
WDW EM  
SSB 0  
GB 0  
PC 1.40

F2 - Processing Parameters  
SI 1024  
SF 600.3000079 MHz  
WDW EM  
SSB 0  
GB 0  
PC 1.40
